## Note

Coumarins from *Clausena anisum-olens* Merr.Yun-Song WANG,<sup>1</sup> Rong HUANG,<sup>1</sup> Ning-Zhong LI,<sup>2</sup> and Jing-Hua YANG<sup>1,†</sup><sup>1</sup>Key Laboratory of Medicinal Chemistry for Natural Resources, Ministry of Education, School of Chemical Science and Technology, Yunnan University, Kunming 650091, P.R. China<sup>2</sup>Xin Feng Hospital of Xi-Shang District, Kunming 650100, P.R. China

Received March 1, 2010; Accepted April 15, 2010; Online Publication, July 7, 2010

[doi:10.1271/bbb.100143]

Seven coumarins, including a new *O*-terpenoidal coumarin, named anisumarin (**1**), were isolated from *Clausena anisum-olens* Merr. The structure of this new coumarin was identified as 7-*{(E)-4-[(4-acetoxymethyl-1,5-dihydro-5-oxo)-2H-furylium-2-yl]-3-methyl-2-butenoyl}*-8-methoxycoumarin on the basis of an extensive spectroscopic analysis.

**Key words:** coumarins; anisumarin; Rutaceae; *Clausena anisum-olens* Merr.

The plants of the Rutaceae family are well-known to contain structurally diverse and biologically active coumarins.<sup>1–6</sup> *Clausena anisum-olens* Merr. is a shrub growing wild and cultivated from Philippines and South China through Southeast Asia, and the aerial parts of this plant have been used for treating dysentery and arthritis.<sup>7</sup> Our previous phytochemical studies on *C. anisum-olens* Merr., which was collected from Hekou County in Yunnan province, P.R. China, resulted in the isolation of new monoterpenoid coumarins.<sup>8–10</sup> Our ongoing search for bioactive metabolites from the genus *Clausena* isolated seven coumarins, including a new *O*-terpenoidal coumarin (**1**), from *C. anisum-olens* Merr.

Powdered plant material of *C. anisum-olens* Merr. (22.5 kg) was repeatedly extracted with EtOH at room temperature. The extract was then concentrated under reduced pressure to give a brown syrup which was suspended in H<sub>2</sub>O and sequentially partitioned with petroleum ether (PE), EtOAc, and *n*-BuOH. The EtOAc extract (110.5 g) was subjected to silica gel column chromatography, eluting with PE-EtOAc (4:1–2:3), EtOAc, EtOAc–MeOH (8:2–1:1) and MeOH, and a total of nine fractions (I–IX) were obtained. Fraction III was subjected to column chromatography over silica gel by gradient elution, using PE-EtOAc (5:1 and 3:1), to yield **2** (10 mg). Fraction IV was resubmitted to column chromatography over silica gel by gradient elution, using CHCl<sub>3</sub>–EtOAc, and then to Sephadex LH-20 (using MeOH as the eluent) to yield compounds **1** (5 mg) and **5** (25 mg). Fraction V was purified on silica gel, eluting with PE-acetone (3:1), and purified further by CC, developed with CHCl<sub>3</sub>–acetone (96:4) to yield **3** (12 mg) and **7** (15 mg). Fraction VI was applied to a silica gel column, eluting with CHCl<sub>3</sub>–acetone (5:1, 3:1), and then to Sephadex LH-20 (MeOH) to yield **6** (11 mg) and **4** (8 mg).

Compound **1**,  $[\alpha]_D^{20.7} -16.7^\circ$  (*c* 0.12, CH<sub>3</sub>OH), was isolated as a colorless oil. The molecular formula of C<sub>22</sub>H<sub>22</sub>O<sub>8</sub> was deduced from the HR-ESI-MS data, exhibiting the molecular ion at *m/z* 415.1386 [M]<sup>+</sup> (calcd. for 415.1392), which was also confirmed by NMR spectra. Its UV spectrum with  $\lambda_{\max}$  256, 319 nm is characteristic of a coumarin derivative. The IR spectra showed an additional C=O stretching band at 1,763 cm<sup>-1</sup> together with the coumarin carbonyl band in the vicinity of 1,728 cm<sup>-1</sup>, indicating the presence of a  $\gamma$ -lactone ring. The <sup>1</sup>H-NMR spectrum of **1** displayed two doublets at  $\delta$  6.25 and 7.86 (*J* = 9.6 Hz) characteristic of H-3 and H-4 of coumarins. The presence of a further two proton doublets at  $\delta_H$  7.31 and 7.03 (each *d*, *J* = 8.7 Hz) in the <sup>1</sup>H-NMR spectrum, and the resonance of carbons bearing two oxygen moieties at  $\delta_C$  156.3 s and 137.4 s indicated a 7,8-disubstituted coumarin.<sup>11</sup>

An analysis of the <sup>1</sup>H- and <sup>13</sup>C-NMR spectra, including COSY and HMQC, suggested the presence of a C<sub>10</sub> terpenoid side chain, similar to the previously isolated coumarins from *C. anisum-olens* Merr. The location of the side chain at C-7 was based on the observation of long-range C–H correlation between the methylene protons at  $\delta_H$  4.73 (H-1') and the oxygenated carbon ( $\delta_C$  156.3, C-7). The presence of only one methoxyl signal at  $\delta_H$  3.92 and significant HMBC correlation with a quaternary carbon signal at  $\delta_C$  137.4 s revealed the methoxyl group to be unequivocally located on C-8. The *E* configuration of the C-2'/C-3' double bond was suggested by the <sup>13</sup>C-NMR chemical shift value of C-10' ( $\delta_C$  17.5) and the HMBC analysis (Fig. 1). The NOE correlations between H-1' and H-10' and between H-2' and H-4' further supported this.

In addition, the presence of a lone 2H-broad singlet at  $\delta$  4.77 in the <sup>1</sup>H spectrum, and the long-distance correlations between a 2H-broad singlet at  $\delta$  4.77 and  $\delta$  130.5 (s, C-7'), 154.0 (d, C-6'), 173.6 (s, C-8') indicated the presence of a 3-hydroxymethyl-3,4-unsaturated- $\gamma$ -lactone moiety in the molecule. In the <sup>1</sup>H spectrum, except for the signals of *O*-terpenoidal coumarin, there was an additional signal ( $\delta$  2.06, 3H) for an acetoxyl group. The clear long-range C–H correlation between the acetoxyl signals and oxymethylene at  $\delta$  58.4 suggested the position of the acetoxyl group at C-9'. The foregoing evidence enabled compound **1** to be identified as 7-*{(E)-4-[(4-acetoxymethyl-*

<sup>†</sup> To whom correspondence should be addressed. Tel: +86-871-6598387; Fax: +86-871-5035538; E-mail: yangjh@ynu.edu.cn; yangjkh@hotmail.com

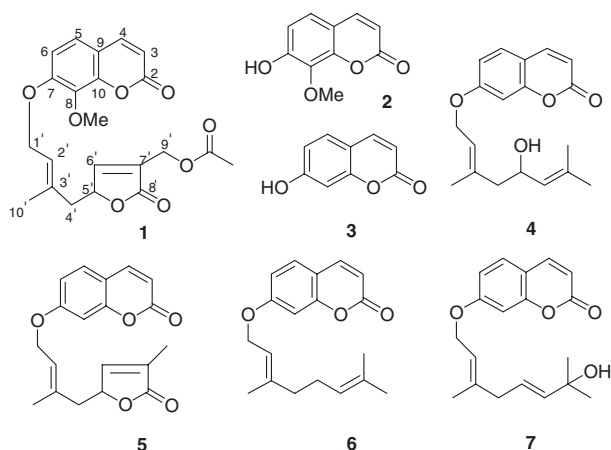

Fig. 1. Structures of Coumarins 1–7.

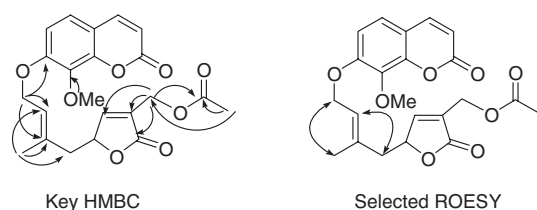

Fig. 2. Key HMBC Correlations, and Selected ROESY Correlations for 1.

1,5-dihydro-5-oxo)-2H-furylium-2-yl]-3-methyl-2-butenoxy}-8-methoxycoumarin, named anisumarin (Fig. 1).

The configuration pertaining to the C-5' position of *O*-terpenoidal coumarin 1 remains to be determined. The stereochemistry of this type of *O*-terpenoidal coumarin reported previously has not so far been resolved.<sup>2,4,9</sup> Compound 1 was assayed for its cytotoxicity against human cervical cancer (Hela) cell lines, and was found to be inactive. A further bioassay is being continued.

The structures of known compounds 2–7 have been identified as isoscopoletin (2),<sup>12</sup> umbelliferone (3),<sup>13</sup> anisocoumarin H (4),<sup>14</sup> capnolactone (5),<sup>15</sup> aurapten (6)<sup>16</sup> and 7-[(*E*)-7'-hydroxy-3',7'-dimethylocta-2',5'-dienyloxy]-coumarin (7) (see Fig. 1).<sup>17</sup> All of these known compounds were identified by comparing their IR, UV, <sup>1</sup>H- and <sup>13</sup>C-NMR, TLC, and/or melting point (mp) data with corresponding authentic samples or literature data.

It is well-known that coumarins are an important and well-recognized group of compounds in the genus *Clausena*, and significant diversification in the coumarin composition among species has been observed.<sup>1–6</sup> Of major coumarin classes, mono- and di-oxygenated coumarins are often widely distributed. All the isolated coumarins in this study were oxygenated at C-7, most with the normal geranyl or prenyl side-chain. Hence, the results of the present study support the notion that coumarins are a distinguishable chemical marker for the genus *Clausena*. Moreover, it seems that the ability to oxidize the coumarin nucleus at C-7 is a common factor for *C. anisum-olens* Merr.

Table 1. <sup>13</sup>C- (125 MHz) and <sup>1</sup>H- (500 MHz) NMR Data for 1 (in CD<sub>3</sub>OD)

| Position | $\delta_C$ | $\delta_H$<br>(integral, mult,<br><i>J</i> in Hz) | Position | $\delta_C$ | $\delta_H$<br>(integral, mult,<br><i>J</i> in Hz) |
|----------|------------|---------------------------------------------------|----------|------------|---------------------------------------------------|
| 2        | 162.9      | /                                                 | 3'       | 137.7      | /                                                 |
| 3        | 113.8      | 6.25 (1H, d, 9.6)                                 | 4'a      | 43.3       | 2.59 (1H, dd,<br>14.8, 5.4)                       |
| 4        | 146.0      | 7.86 (1H, d, 9.6)                                 | 4'b      | 43.3       | 2.54 (1H, dd,<br>14.8, 7.3)                       |
| 5        | 124.6      | 7.31 (1H, d, 8.7)                                 | 5'       | 82.2       | 5.24 (1H, m)                                      |
| 6        | 111.8      | 7.03 (1H, d, 8.7)                                 | 6'       | 154.0      | 7.53 (1H, d, 1.5)                                 |
| 7        | 156.3      | /                                                 | 7'       | 130.5      | /                                                 |
| 8        | 137.4      | /                                                 | 8'       | 173.6      | /                                                 |
| 9        | 115.3      | /                                                 | 9'       | 58.4       | 4.77 (2H, s)                                      |
| 10       | 149.2      | /                                                 | 10'      | 17.5       | 1.84 (3H, s)                                      |
| 1'       | 66.9       | 4.73 (2H, dd,<br>6.4, 2.3)                        | OMe      | 61.7       | 3.93 (3H, s)                                      |
| 2'       | 124.9      | 5.63 (1H, t, 6.4)                                 | OAc      | 20.5       | 2.06 (3H, s)                                      |
|          |            |                                                   |          |            | 172.1                                             |

## Acknowledgments

This work was supported by the National Nature Science Foundation of China (no. 20862018), the Science Foundation of Yunnan University (grant nos. 2009B10Q and 2005Z001A), and the Science Foundation of Yunnan Province (grant nos. 2006B0003Q, 2007B0006Z, and 2007PY01-23).

## References

- Chlouchi A, Muiyard F, Girard C, Waterman PG, and Bévalot F, *Biochem. Syst. Ecol.*, **33**, 967–969 (2005).
- He HP, Shen YM, He YN, Yang XS, Zhu WM, and Hao XJ, *Heterocycles*, **53**, 2067–2070 (2000).
- Huang SC, Wu PL, and Wu TS, *Phytochemistry*, **44**, 179–181 (1997).
- Ito C, Itoigawa M, Katsuno S, Omura M, Tokuda H, Nishino H, and Furukawa H, *J. Nat. Prod.*, **63**, 1218–1224 (2000).
- Takemura Y, Nakamura K, Hirusawa T, Ju-ichi M, Ito C, and Furukawa H, *Chem. Pharm. Bull.*, **48**, 582–584 (2000).
- Phuwapraisrisan P, Surapinit S, Sombund S, Siripong P, and Tip-pyang S, *Tetrahedron Lett.*, **47**, 3685–3688 (2006).
- Wu ZY, “Flora Yunnanica” (in Chinese) Vol. 6, Science Press, Beijing, p. 767 (1995).
- Wang YS, Huang R, Li L, Zhang HB, and Yang JH, *Biochem. Syst. Ecol.*, **36**, 801–803 (2008).
- Wang YS, He HP, Yang JH, Di YT, and Hao XJ, *Molecules*, **13**, 931–937 (2008).
- Wang YS, Xu HY, Wang DX, and Yang JH, *Molecules*, **14**, 771–776 (2009).
- Rosa SD, Mitova M, Handjieva N, and Calis I, *Phytochemistry*, **59**, 447–450 (2002).
- Kong YC, Lau CP, Wat KH, Ng KH, But PPH, Cheng KF, and Waterman PG, *Planta Med.*, **55**, 176–178 (1989).
- Ito C and Furukawa H, *Chem. Pharm. Bull.*, **35**, 4277–4285 (1987).
- Ngadjui BT, Ayafor JF, Sondengam BL, and Connolly JD, *J. Nat. Prod.*, **52**, 243–247 (1989).
- Bohlmann F and Clausen E, *Chem. Ber.*, **103**, 3619–3622 (1970).
- Ishii H, Ishikawa T, Mihara M, and Akaike M, *Yakugaku Zasshi*, **103**, 279–292 (1983).
- Quader MA, El-Turbi JA, Armstrong JA, Gray AI, and Waterman PG, *Phytochemistry*, **31**, 3083–3089 (1992).
